# Supplementary material for: Are you really doing ‘codesign’? Critical reflections when working with vulnerable populations
Source: PubMed Central journal article supplement — BMJ Open. 2020 Nov 3;10(11):e038339. doi: 10.1136/bmjopen-2020-038339 (PMC7640510; doi:10.1136/bmjopen-2020-038339), 2020-11-03
Supplement: bmjopen-2020-038339.draft_revisions.pdf [file bmjopen-2020-038339.draft_revisions.pdf]

# BMJ Open

BMJ Open is committed to open peer review. As part of this commitment we make the peer review history of every article we publish publicly available.

When an article is published we post the peer reviewers' comments and the authors' responses online. We also post the versions of the paper that were used during peer review. These are the versions that the peer review comments apply to.

The versions of the paper that follow are the versions that were submitted during the peer review process. They are not the versions of record or the final published versions. They should not be cited or distributed as the published version of this manuscript.

BMJ Open is an open access journal and the full, final, typeset and author-corrected version of record of the manuscript is available on our site with no access controls, subscription charges or pay-per-view fees (<http://bmjopen.bmj.com>).

If you have any questions on BMJ Open's open peer review process please email [info.bmjopen@bmj.com](mailto:info.bmjopen@bmj.com)

# BMJ Open

## Are you really doing “co-design”? Critical reflections when working with vulnerable populations

|                                 |                                                                                                                                                                                                                                                                                                                                                                                                                                                                                                                                                                                                         |
|---------------------------------|---------------------------------------------------------------------------------------------------------------------------------------------------------------------------------------------------------------------------------------------------------------------------------------------------------------------------------------------------------------------------------------------------------------------------------------------------------------------------------------------------------------------------------------------------------------------------------------------------------|
| Journal:                        | <i>BMJ Open</i>                                                                                                                                                                                                                                                                                                                                                                                                                                                                                                                                                                                         |
| Manuscript ID                   | bmjopen-2020-038339.R1                                                                                                                                                                                                                                                                                                                                                                                                                                                                                                                                                                                  |
| Article Type:                   | Communication                                                                                                                                                                                                                                                                                                                                                                                                                                                                                                                                                                                           |
| Date Submitted by the Author:   | 10-Jun-2020                                                                                                                                                                                                                                                                                                                                                                                                                                                                                                                                                                                             |
| Complete List of Authors:       | Moll, Sandra; McMaster Univ, School of Rehabilitation Science; McMaster University<br>Wyndham-West, Michelle; OCAD University<br>Mulvale, Gillian ; McMaster University,<br>Park, Sean; McMaster University Faculty of Health Sciences<br>Buettgean, Alexis; McMaster Univ, School of Rehabilitation Science<br>Phoenix, Michelle; McMaster University Institute for Applied Health<br>Sciences, ; McMaster University and CanChild<br>Fleisig, Robert; McMaster Univ, Walter G. Booth School of Engineering<br>Practice and Technology<br>Bruce, Emma; McMaster Univ, School of Rehabilitation Science |
| <b>Primary Subject Heading</b>: | Research methods                                                                                                                                                                                                                                                                                                                                                                                                                                                                                                                                                                                        |
| Secondary Subject Heading:      | Health services research                                                                                                                                                                                                                                                                                                                                                                                                                                                                                                                                                                                |
| Keywords:                       | STATISTICS & RESEARCH METHODS, QUALITATIVE RESEARCH, Organisation of health services < HEALTH SERVICES ADMINISTRATION & MANAGEMENT, Quality in health care < HEALTH SERVICES ADMINISTRATION & MANAGEMENT                                                                                                                                                                                                                                                                                                                                                                                                |
|                                 |                                                                                                                                                                                                                                                                                                                                                                                                                                                                                                                                                                                                         |

SCHOLARONE™  
Manuscripts

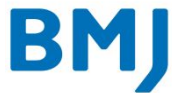

I, the Submitting Author has the right to grant and does grant on behalf of all authors of the Work (as defined in the below author licence), an exclusive licence and/or a non-exclusive licence for contributions from authors who are: i) UK Crown employees; ii) where BMJ has agreed a CC-BY licence shall apply, and/or iii) in accordance with the terms applicable for US Federal Government officers or employees acting as part of their official duties; on a worldwide, perpetual, irrevocable, royalty-free basis to BMJ Publishing Group Ltd ("BMJ") its licensees and where the relevant Journal is co-owned by BMJ to the co-owners of the Journal, to publish the Work in BMJ Open and any other BMJ products and to exploit all rights, as set out in our [licence](#).

The Submitting Author accepts and understands that any supply made under these terms is made by BMJ to the Submitting Author unless you are acting as an employee on behalf of your employer or a postgraduate student of an affiliated institution which is paying any applicable article publishing charge ("APC") for Open Access articles. Where the Submitting Author wishes to make the Work available on an Open Access basis (and intends to pay the relevant APC), the terms of reuse of such Open Access shall be governed by a Creative Commons licence – details of these licences and which [Creative Commons](#) licence will apply to this Work are set out in our licence referred to above.

Other than as permitted in any relevant BMJ Author's Self Archiving Policies, I confirm this Work has not been accepted for publication elsewhere, is not being considered for publication elsewhere and does not duplicate material already published. I confirm all authors consent to publication of this Work and authorise the granting of this licence.

1  
2  
3 **Are you really doing “co-design”? Critical reflections when working with**  
4  
5  
6 **vulnerable populations**  
7  
8

9 **Authors:** Sandra Moll<sup>1</sup>, Michelle Wyndham-West<sup>2</sup>, Gillian Mulvale<sup>1</sup>, Sean Park<sup>1</sup>, Alexis  
10 Buettgean<sup>1</sup>, Michelle Phoenix<sup>1</sup>, Robert Fleisig<sup>1</sup> & Emma Bruce<sup>1</sup>  
11  
12

13  
14 **Author affiliations:**

15 <sup>1</sup>McMaster University, Hamilton Ontario, Canada

16 <sup>2</sup>OCAD University, Toronto Ontario, Canada  
17  
18

19 **Corresponding author:**

20 Sandra Moll

21 School of Rehabilitation Science

22 Institute of Applied Health Sciences

23 McMaster University

24 1400 Main St. W.

25 Hamilton, ON L8S 1C7

26 phone: (905) 525-9140 x 23523

27 fax: 905-524-0069

28 email: molls@mcmaster.ca  
29  
30  
31  
32  
33

34 **Keywords:**

35 Patient participation

36 Ethics, research

37 Research design, qualitative

38 Quality improvement

39 Co-production  
40  
41

42 **Word count:** 2305 words  
43  
44  
45  
46  
47  
48  
49  
50  
51  
52  
53  
54  
55  
56  
57  
58  
59  
60

## Are you really doing “co-design”? Critical reflections when working with vulnerable populations

### Abstract

“Co-design” and associated terms such as “co-production” or “patient engagement”, are increasingly common in the health research literature, due to an increased emphasis on the importance of ensuring that research related to service/systems development is meaningful to end-users. However, there continues to be a lack of clarity regarding the key principles and practices of co-design, and wide variation in the extent to which service users are meaningfully engaged in the process. These issues are particularly acute when end-users include populations who have significant health and healthcare disparities that are linked to a range of intersecting vulnerabilities (e.g., poverty, language barriers, age, disability, minority status, stigmatized conditions). The purpose of this paper is to prompt critical reflection on the nature of co-design research with vulnerable populations, including key issues to consider in the initial planning phases, the implementation process, and final outputs. Risks and tensions will be identified in each phase of the process, followed by a tool to foster reflexivity in co-design processes to address these issues.

## Introduction

Over the last decade, co-design has emerged as a ubiquitous research and service/systems development approach across a myriad of health-oriented-disciplines including, but not limited to, health services,<sup>1-4</sup> quality improvement,<sup>5</sup> health technology development;<sup>6,7</sup> Indigenous health<sup>8,9</sup> and community-based health.<sup>10</sup> Application of co-design approaches are increasingly evident with populations who experience vulnerability due to social, economic and environmental barriers, from children,<sup>6,11,12</sup> through to older adults.<sup>13-15</sup> Researchers and practitioners within these disciplines have deployed co-design approaches across a range of settings, using various terms such as co-creation, co-production, co-research, experience-based co-design, human-centered design, technology co-design, participatory research, collaborative and community-based research.<sup>16,17</sup> The terms are linked to sets of core principles regarding the value of lived experience, collaboration, building on capabilities, and creativity.<sup>16</sup> Co-design, at a basic level, refers to application of user-centric research and service/systems development approaches in order to solve a particular problem or challenge.<sup>18</sup> However, co-design has also been described as a dynamic, creative approach to research that embraces partnership with community, and focuses on systems change and improving human experience.<sup>16</sup>

The increasing use of the term co-design and its associated methodologies has made it challenging to distinguish whether or not the term has been co-opted in such a way that sidesteps meaningful engagement with the original principles of co-design: distribution of power in research, amelioration of the human experience and positive societal impact. These issues are particularly acute when engaging populations who are 'vulnerable'; considering

1  
2  
3 vulnerability not as an individual characteristic, but as the result of social and systemic barriers  
4  
5 (e.g., poverty, literacy, language barriers, and discrimination related to age, disability status,  
6  
7 ethnicity/race, gender).  
8  
9

10 In this article, we critically discuss three questions, with a particular focus on research  
11  
12 with vulnerable service users: 1) What is the epistemological starting point that is underpinning  
13  
14 the decision to apply co-design processes and techniques? 2) How are co-design  
15  
16 methodologies, planned, applied, and adapted while engaging in iterative “research through  
17  
18 design” processes? 3) What type of post co-design outputs can be anticipated and created, and  
19  
20 what will the manifest and latent impacts of these outputs be? The critical discussion which  
21  
22 ensues places a particular emphasis on how power is conceptualized, deployed and  
23  
24 received<sup>19</sup> within co-design processes aimed to ameliorate health services, products and  
25  
26 experiences for vulnerable individuals and groups.  
27  
28  
29  
30  
31  
32  
33  
34

### 35 **Where are you starting from?**

36  
37 Advancing effective and ethical co-design should start with critical reflection on the  
38  
39 epistemological beliefs that are driving initiation of the process, including the ‘mindset’ of the  
40  
41 co-design facilitators. Co-design should begin with critical and embodied reflexivity that attends  
42  
43 to 1) ourselves – the subjective self or “I”; 2) our relationship with others – the intersubjective  
44  
45 “we”; and 3) the systems in which we and others are embedded – the objective “it”.<sup>20</sup>  
46  
47  
48  
49  
50  
51

52 The first point of reflection is internal; as a facilitator of co-design, it is important to consider  
53  
54 the worldview, assumptions and values that you bring to the process. Co-design facilitators  
55  
56  
57  
58  
59  
60

1  
2  
3 need to embrace critical, reflexive practice, including development of a subjective, embodied  
4 understanding of their own standpoints and epistemological frameworks that will impact their  
5 relationships with others.<sup>21</sup> They need to be capable of improvising and taking other  
6 perspectives, and be willing to be transformed in the process.<sup>22</sup> These capabilities are  
7 cultivated through enhancing mindful awareness of, and working with the thoughts, emotions,  
8 perceptions, sensations, that arise as part of being in an interpersonal relationship.<sup>23</sup>  
9  
10  
11  
12  
13  
14  
15  
16  
17  
18  
19

20 The second point of reflection is on your relationship with others who are engaged in the co-  
21 design. This includes attending to the effects that you have as a researcher, educator and/or  
22 practitioner at every step of the design process. It also involves a commitment to ongoing  
23 dialogue about various ways of knowing, the interrogation of power and privilege, and making  
24 the time and space to listen, share and co-create.<sup>24</sup> The humanity and multi-dimensionality of  
25 all participants must be respected and attended to with care, compassion, creativity and  
26 humility. Relationships require openness and vulnerability in the immediacy of human-to-  
27 human connection.<sup>25</sup>  
28  
29  
30  
31  
32  
33  
34  
35  
36  
37  
38  
39  
40  
41

42 The third and final point of reflection is on the system in which the co-design process will  
43 occur. There may be a clash of values since many organizations operate within a socio-political  
44 environment that privileges individualism over collectivism, self-sufficiency over collaboration,  
45 and scientific expertise over other ways of knowing based on lived experiences.<sup>3,26</sup> The  
46 fundamental principles of collaboration in co-design may be subverted in the drive for  
47 efficiency and top-down decision making. Critical awareness and resistance to these pressures  
48  
49  
50  
51  
52  
53  
54  
55  
56  
57  
58  
59  
60



1  
2  
3 may be needed in order to find the time and space required for an authentic way of working  
4  
5 together for social justice and change. Beginning a co-design project requires institutional  
6  
7 support to ensure that there is a commitment to critical thinking, learning and change,<sup>27</sup> that  
8  
9 diverse people are given an opportunity to participate,<sup>28</sup> and that sufficient resources (including  
10  
11 funding and space) are provided.  
12  
13  
14  
15  
16  
17

### 18 **What should you be doing?**

19  
20  
21  
22 Co-design has been described as both a philosophy and a method<sup>27</sup> that includes authentic and  
23  
24 equitable collaboration between stakeholders in projects that are emergent, flexible, and  
25  
26 iterative.<sup>28</sup> There are several specific approaches that have been used in the context of  
27  
28 healthcare, including experience-based co-design (EBCD),<sup>29,30</sup> participatory research,<sup>1,8</sup> and user  
29  
30 centred design.<sup>31</sup> Each approach has its own processes and tools, but there are several  
31  
32 overarching issues to consider in optimizing the process of collaboration and design.  
33  
34  
35  
36  
37  
38  
39

40 First, it is critical to include diverse people in the co-design process, including those with lived  
41  
42 experience, those who deliver or implement a service or program, and other key stakeholders  
43  
44 or influencers.<sup>28</sup> A noteworthy criticism of co-design specifically, and patient-oriented research  
45  
46 generally, is that vulnerable populations may be excluded<sup>32</sup> or represented by 'super users' who  
47  
48 do not reflect the typical population.<sup>33</sup> Super users are individuals who frequently contribute to  
49  
50 research projects. They are often invited to participate since they are actively engaged,  
51  
52 articulate, and clearly understand their role in the process. One of the dangers, however, is  
53  
54  
55  
56  
57  
58  
59  
60

1  
2  
3 that over time, socialization to their research role may desensitize them to the perspective of  
4  
5 those experiencing greater disenfranchisement.<sup>33</sup> It takes time and effort to ensure  
6  
7 representation from the important, but often unheard voices of communities who face many  
8  
9 barriers to engagement.  
10  
11  
12  
13  
14

15 When engaging groups from historically marginalized communities, sensitivity to power  
16  
17 differentials and creative approaches may be needed to ensure a safe and inclusive space for  
18  
19 collaboration. Invited spaces have been criticized for perpetuating marginalization and  
20  
21 tokenism, since unexamined power imbalances may delegitimize forms of knowledge that  
22  
23 depart from the status quo.<sup>34</sup> Principles and tools for engagement could include: a) formalizing  
24  
25 agreements for shared leadership, decision making and ownership of knowledge; b) providing  
26  
27 training and ongoing mentorship for new participants who may be uncomfortable and/or  
28  
29 unfamiliar with the process; c) ensuring flexibility to account for differences and fluctuations in  
30  
31 ability to participate; and d) establishing formal recognition for the value of service user  
32  
33 input.<sup>28,33,34</sup> Richards and colleagues<sup>35</sup> present an insightful argument regarding compensation  
34  
35 for service users in order to recognize vulnerability, promote equity, facilitate commitment, and  
36  
37 remove barriers to participation. They suggest starting the conversation early to build  
38  
39 relationships, negotiating a fair rate that addresses the needs of all parties, and establishing a  
40  
41 formal agreement on roles and responsibilities in order to avoid the risk of tokenism.  
42  
43  
44  
45  
46  
47  
48  
49  
50  
51

52 Specific steps of co-design may vary depending upon the project, however, core processes  
53  
54 include building trust, finding voice, sharing perspectives and creating a common vision for  
55  
56  
57  
58  
59  
60

1  
2  
3 change.<sup>28</sup> Arts-based tools and techniques can be incorporated to generate initial insights into  
4 stakeholder experiences, as well to foster creativity in designing solutions. Generative design  
5 strategies, as outlined by Sanders & Stappers,<sup>31</sup> emphasize the role of “doing” and “making’ as  
6 alternate paths of expression that can evoke deeper insights and creative solutions. They  
7 highlight how a range of probes, generative toolkits and prototyping strategies can facilitate the  
8 co-design process, using creative tools such as video, storyboards, clay and even Lego to evoke  
9 insights and ideas that transcend what people might put into words. These strategies may be  
10 particularly effective to engage service users who may have difficulty with purely verbal  
11 interviews or focus group discussions (eg. recent immigrants, young children, older adults with  
12 dementia).

13  
14  
15  
16  
17  
18  
19  
20  
21  
22  
23  
24  
25  
26  
27  
28  
29  
30 Rather than following a series of rigid steps, working with vulnerable populations requires  
31 following a set of core principles; “taking time to fully engage, listen for understanding and not  
32 move forward until participants or communities are ready”.<sup>28(p295)</sup> One of the challenges for co-  
33 design facilitators is responding to pressures related to resource and time constraints that could  
34 compromise the process.<sup>27</sup>

### 44 45 **What are your intended outputs?**

46  
47  
48  
49 In addition to how co-design is implemented, it is critical to examine outputs of the process.

50  
51  
52 With its roots in design thinking and action research, co-design involves creating prototype  
53 solutions to address the priority problems or issues. Ultimately, the process should continue to  
54  
55  
56  
57  
58  
59  
60

1  
2  
3 implementation and evaluation of the proposed solutions, with a commitment to ongoing  
4  
5 collaboration in the process of change.<sup>36,37</sup> Without this movement to positive change,  
6  
7 participants can become disempowered and even resentful, particularly with perpetuation of  
8  
9 the status quo.  
10  
11  
12  
13  
14

15 The specific outputs and outcomes of co-design are varied, but can occur on several levels,  
16  
17 from individual to systems change. A survey of 59 EBCD projects in 6 countries found that most  
18  
19 projects initially targeted small quality improvements, however the legacies of the co-design  
20  
21 work had much larger impacts in terms of “deep changes in attitudes and behaviors”.<sup>30</sup>  
22  
23

24 Similarly, Palmer et al.<sup>38</sup> argue that while practical solutions are important, the skills gained by  
25  
26 service users, family/caregivers and staff in negotiating new ways of advancing the future that  
27  
28 they have helped to shape is even more significant. This can be particularly important for  
29  
30 groups who have a history of fractured relations (eg. mental health service users), wherein new  
31  
32 shared identities can be developed as the basis for a restructuring of future relationships.<sup>39,40</sup>  
33  
34

35 These attitudinal and behavioural shifts are important in shifting culture within a service, and  
36  
37 thereby improve the inter-personal dynamics of care,<sup>41</sup> including power sharing and enhanced  
38  
39 communication between service professionals and users.<sup>42</sup> The ultimate hope is for positive,  
40  
41 sustained change in health and/or social services through outputs of greater empathy,  
42  
43 increased trust, shared commitment and advocacy.<sup>38</sup> The extent to which this occurs will  
44  
45 depend on adopting and adhering to core principles and skilled facilitation.<sup>28,43</sup>  
46  
47  
48  
49  
50  
51  
52  
53  
54  
55  
56  
57  
58  
59  
60

## The way forward

The ubiquity of co-design as a strategy for health service and system reform, and the diversity in how it is defined, begs the question of whether there should be standards for implementation and evaluation, as well as critical reflection on the implications of doing this work with participants who experience a range of vulnerabilities.

As noted earlier, careful planning and critical reflection is needed to ensure that the process does not produce “token” service user involvement or further perpetuate inequities. A useful guidance document developed by INVOLVE<sup>44</sup> outlines key principles and strategies to consider in co-producing a research project. Also, guidelines for reporting on patient and public involvement in health and social care research (GRIPP2) have been proposed as a strategy to advance quality and transparency in co-design.<sup>45</sup> These guidelines are a helpful step toward consistency in language and reporting of co-design processes, outputs and outcomes, as well as a useful tool for generating critical reflection on the engagement of service users in research. The next steps are to create more specific questions to critically evaluate co-design projects stemming from the three overarching questions addressed in this article. Table 1 outlines a list of suggested sub-questions to consider, which reflect the high level of engagement expected throughout the entirety of a co-design project.

[Insert Table 1 about here]

1  
2  
3 Another key step forward will be more robust evaluation of co-design work, in terms of costs  
4 and benefits, quality improvement and wider systems impacts.<sup>30</sup> In their review of health-  
5 related co-design research, Slatterly and colleagues<sup>18</sup> echo the call for systematic research on  
6 the effectiveness of various co-design approaches and strategies. They emphasize that  
7 research should be theoretically informed, and build on implementation science principles that  
8 capture the context and complexity of the co-design process. Realist evaluation, therefore, is a  
9 promising approach, since it considers the impact of the context, as well as the mechanisms of  
10 change that shape project outcomes.<sup>46</sup> Realist evaluations are also based on a theory of change  
11 which can help to explicate the relationship between various dimensions of the co-design  
12 process and how they lead to change.<sup>47</sup>

13  
14  
15  
16  
17  
18  
19  
20  
21  
22  
23  
24  
25  
26  
27  
28  
29  
30 In conclusion, it should be recognized that co-design can be a powerful tool to contest  
31 vulnerability through authentic collaboration in research and service / system design. Co-design  
32 is a philosophy and method that has the potential to empower people, both researchers and  
33 participants, service providers and service users, policy makers and community members. It  
34 must be recognized, however, that co-design is ultimately a relational process and as such,  
35 careful attention must be paid to ensuring that the process does not perpetuate inequities. The  
36 realities of fiscal and time constraints must be balanced with critical reflexivity and  
37 commitment to creating meaningful collaborative solutions.  
38  
39  
40  
41  
42  
43  
44  
45  
46  
47  
48  
49  
50  
51  
52  
53  
54  
55  
56  
57  
58  
59  
60

**Table 1 - A Tool to Foster Reflexivity in Co-Design with Vulnerable Populations**

|                                                                                                                                                                                                                                                                                                                                                                                                                                                                                                                                                                                                          |
|----------------------------------------------------------------------------------------------------------------------------------------------------------------------------------------------------------------------------------------------------------------------------------------------------------------------------------------------------------------------------------------------------------------------------------------------------------------------------------------------------------------------------------------------------------------------------------------------------------|
| <p><b><i>Where are you starting from?</i></b></p> <ol style="list-style-type: none"> <li>1. What are your worldviews, assumptions and values relevant to the issue(s) or problem(s) you are trying to address? How open are you to being transformed by other worldviews?</li> <li>2. How will you respectfully interact and compassionately attend to human diversity, and various ways of knowing?</li> <li>3. How will you interrogate power and privilege?</li> <li>4. How will you make time and space for sharing, dialogue and co-creation despite timelines and resource constraints?</li> </ol> |
| <p><b><i>What should you be doing?</i></b></p> <ol style="list-style-type: none"> <li>1. How will you purposefully select a broad range of stakeholder perspectives and representatives? How do you define inclusive participation?</li> <li>2. What tools, processes and techniques will you use to fully understand lived experiences, build rapport and foster trust within an environment of open and respectful dialogue?</li> <li>3. How will you tap into tacit knowledge, creativity and shared meaning of diverse perspectives to co-create a shared vision for improvement?</li> </ol>         |
| <p><b><i>What are your intended outputs?</i></b></p> <ol style="list-style-type: none"> <li>1. How will you facilitate implementation of prototype solutions?</li> <li>2. How will you foster commitment to change to minimize the risk of tokenistic engagement of vulnerable populations and perpetuating the status quo?</li> </ol>                                                                                                                                                                                                                                                                   |

- 1
  - 2
  - 3
  - 4
  - 5
  - 6
  - 7
  - 8
  - 9
  - 10
  - 11
  - 12
  - 13
  - 14
  - 15
  - 16
  - 17
  - 18
  - 19
  - 20
  - 21
  - 22
  - 23
  - 24
  - 25
  - 26
  - 27
  - 28
  - 29
  - 30
  - 31
  - 32
  - 33
  - 34
  - 35
  - 36
  - 37
  - 38
  - 39
  - 40
  - 41
  - 42
  - 43
  - 44
  - 45
  - 46
  - 47
  - 48
  - 49
  - 50
  - 51
  - 52
  - 53
  - 54
  - 55
  - 56
  - 57
  - 58
  - 59
  - 60
3. How will your co-design processes build capacity and forge new ways of communicating, and in doing so shift service cultures toward greater empathy, trust, shared commitment and advocacy?
4. How will you determine if your project has achieved the desired outcomes? Will these outcomes be sustainable?



1  
2  
3  
4  
5  
6 **Contributorship statement:** The first author (SM) was responsible for the overall paper,  
7 incorporating input from the team. MWW, GM, SP, AB, MP were all involved in writing sections  
8 of the paper. All authors (including RF & EB) were involved in the conceptualization of the paper  
9 and provided feedback on draft versions.  
10

11  
12 **Competing interests:** No competing interests for any author.  
13

14 **Funding:** The Co-design hub for Vulnerable Populations is funded through the McMaster  
15 Strategic Alignment Initiative.  
16

17  
18 **Data sharing:**  
19

20 I, the Submitting Author has the right to grant and does grant on behalf of all authors of the  
21 Work (as defined in the below author licence), an exclusive licence and/or a non-exclusive  
22 licence for contributions from authors who are: i) UK Crown employees; ii) where BMJ has  
23 agreed a CC-BY licence shall apply, and/or iii) in accordance with the terms applicable for US  
24 Federal Government officers or employees acting as part of their official duties; on a  
25 worldwide, perpetual, irrevocable, royalty-free basis to BMJ Publishing Group Ltd (“BMJ”) its  
26 licensees and where the relevant Journal is co-owned by BMJ to the co-owners of the Journal,  
27 to publish the Work in BMJ Open and any other BMJ products and to exploit all rights, as set  
28 out in our [licence](#).  
29  
30  
31

32 The Submitting Author accepts and understands that any supply made under these terms is  
33 made by BMJ to the Submitting Author unless you are acting as an employee on behalf of your  
34 employer or a postgraduate student of an affiliated institution which is paying any applicable  
35 article publishing charge (“APC”) for Open Access articles. Where the Submitting Author wishes  
36 to make the Work available on an Open Access basis (and intends to pay the relevant APC), the  
37 terms of reuse of such Open Access shall be governed by a Creative Commons licence – details  
38 of these licences and which [Creative Commons](#) licence will apply to this Work are set out in our  
39 licence referred to above.  
40  
41  
42  
43  
44  
45  
46  
47  
48  
49  
50  
51  
52  
53  
54  
55  
56  
57  
58  
59  
60

## References

1. Bowen S, McSeveny K, Lockley E, et al. How was it for you? Experiences of participatory design in the UK health service. *CoDesign* 2013;9:230-46.
2. Bowen S, Dearden A, Wright P, et al. Co-designing better outpatient services for older people: inspiration stories for participatory design with health and social care institutions workshop. 11th Biennial Participatory Design; 2010 Nov; Sydney, Australia.
3. Mulvale G, Moll S, Miatello A, et al. Codesigning health and other public services with vulnerable and disadvantaged populations: insights from an international collaboration. *Health Expect* 2019;22:284-97.
4. Wolstenholme D, Cobb MR, Bowen S, et al. Design led service improvement for older people. *Australas Med J* 2010;3:465-70.
5. Greenhalgh T, Russell J, Swinglehurst D. Narrative methods in quality improvement research. *Qual Saf Health Care* 2005;14:443-49.
6. Allsop MJ, Holt RJ, Levesley MC, et al. The engagement of children with disabilities in health-related technology design processes: identifying methodology. *Disabil Rehabil Assist Technol* 2010;5:1-13.
7. Sutcliffe A, Thew S, Bruijn O, et al. User engagement by user-centred design in e-health. *Phil Trans R Soc A* 2010;368:4209-24.
8. Blodgett AT, Schinke RJ, Peltier D, et al. May the circle be unbroken: the research recommendations of aboriginal community members engaged in participatory action research with university academics. *J Sport Soc Issues* 2011;35:264-83.
9. Moscou K, Rempel K, Beeman C, et al. A healthy neighbourhood: voices of indigenous youth. Brandon, Manitoba, Canada: Centre for Aboriginal and Rural Education Studies 2018.

10. Buffel T, Handler S, Philipson C, editors. Age-Friendly Cities and Communities: A Global Perspective. Great Britain: Policy Press 2018.
11. Beresford B. Working on well-being: researchers' experiences of a participative approach to understanding the subjective well-being of disabled young people. *Child Soc* 2012;26:234-41.
12. Veinot TC, Flicker SE, Skinner HA, et al. 'Supposed to make you better but it doesn't really': HIV-positive youths' perceptions of HIV treatment. *J Adolesc Health* 2006;38:261-67.
13. Holroyd-Leduc J, Resin J, Ashley L, et al. Giving voice to older adults living with frailty and their family caregivers: engagement of older adults living with frailty in research, health care decision making, and in health policy. *Res Involv Engagem* 2016;2:1-19.
14. Burnell K, Selwood A, Sullivan T, et al. Involving service users in the development of the support at home: interventions to enhance life in dementia carer supporter programme for family carers of people with dementia. *Health Expect* 2015;18:95-110.
15. Tanner D. Co-research with older people with dementia: experience and reflections. *J Ment Health* 2012;21:296-306.
16. Greenhalgh T, Jackson C, Shaw S, et al. Achieving research impact through co-creation in community-based health services: literature review and case study. *Milbank Q* 2016;94:392-429.
17. Littlechild R, Tanner D, Hall K. Co-research with older people: Perspectives on impact. *Qual Soc Work* 2015;14:18-35.
18. Slattery P, Saeri A, Bragge P. Research co-design in health: a rapid overview of reviews. *Health Res Policy Syst* 2020;18:1-13.
19. Allen A. The Politics of Ourselves: Power, Autonomy and Gender in Contemporary Critical Theory. New York: Columbia University Press 2013.
20. Hochachka G. Developing Sustainability, Developing the Self: An Integral Approach to

- 1  
2  
3 International and Community Development. Victoria, Canada: Trafford 2009.
- 4  
5 21. Cunliffe AL. On becoming a critically reflexive practitioner. *Journal of Management*  
6  
7  
8 *Education* 2004;28:407-26. <http://dx.doi.org/10.1177/1052562904264440>  
9
- 10 22. Keeney H, Keeney B, Chenail R. Recursive Frame Analysis: A Qualitative Research Method  
11  
12 for Mapping Change-Oriented Discourse. Fort Lauderdale, FL: TQR Books 2015.
- 13  
14 23. Varela F. Ethical know-how: Action, wisdom, cognition. Palo Alto, CA: Stanford University  
15  
16 Press 1999.
- 17  
18 24. Hankivsky O. Intersectionality 101. Burnaby: Institute for Intersectionality Research and  
19  
20 Policy, Simon Fraser University 2014.
- 21  
22 25. Cipolla C. Designing for vulnerability: interpersonal relations and design. *She Ji: The*  
23  
24 *Journal of Design, Economics, and Innovation* 2018;4:111-22.  
25  
26 <http://dx.doi.org/10.1016/j.sheji.2018.03.001>  
27  
28  
29
- 30 26. Kelly K, Caputo T. Community: A Contemporary Analysis of Policies, Programs, and  
31  
32 Practices. Toronto, Ontario: University of Toronto Press 2011.
- 33  
34 27. Donetto S, Pierri P, Tsianakas V, et al. Experience based co-design and healthcare  
35  
36 improvement: realizing participatory design in the public sector. *The Design Journal*  
37  
38 2015;18:227-48. doi:10.2752/175630615x14212498964312  
39  
40  
41
- 42 28. Mulvale G, Moll S, Miatello A, et al. Co-designing services for youth with mental health  
43  
44 issues: novel elicitation approaches. *Int J Qual Methods* 2019;18. doi:  
45  
46 10.1177/1609406918816244  
47  
48
- 49 29. Bate P, Robert G. Bringing User Experience to Healthcare Improvement: The Concepts,  
50  
51 Methods and Practices of Experience-Based Design. Oxford: Radcliffe Publishing 2007.
- 52  
53 30. Donetto S, Tsianakas, V, Robert, G. Using Experience-based Co-design (EBCD) to improve  
54  
55  
56  
57  
58  
59  
60

1  
2  
3 the quality of healthcare: mapping where we are now and establishing future directions. London:  
4  
5 King's College London, 2014.  
6

7  
8 31. Sanders E, Stappers P. Probes, toolkits and prototypes: three approaches to making in  
9  
10 codesigning. *CoDesign* 2014;10:5-14. <http://dx.doi.org/10.1080/15710882.2014.888183>  
11

12 32. Gonzalez M, Phoenix M, Saxena S, et al. Strategies used to engage hard-to-reach populations  
13  
14 in childhood disability research: a scoping review. *Disabil Rehabil* Published Online First: Jan  
15  
16 30 2020. doi: 10.1080/09638288.2020.1717649 doi:10.1080/09638288.2020.1717649  
17  
18

19 33. Black A, Strain K, Wallsworth C, et al. What constitutes meaningful engagement for patients  
20  
21 and families as partners on research teams? *J Health Serv Res Policy* 2018;23:158-67.  
22  
23 doi:10.1177/1355819618762960  
24  
25

26 34. De Freitas C, Martin G. Inclusive public participation in health: policy, practice and  
27  
28 theoretical contributions to promote the involvement of marginalised groups in healthcare. *Soc*  
29  
30 *Sci Med* 2015;135:31-39. doi: 10.1016/j.socscimed.2015.04.019  
31  
32

33 35. Richards DP, Jordan I, Strain K, et al. Patient partner compensation in research and health  
34  
35 care: the patient perspective on why and how. *Patient Exp J* 2018;5:6-12. doi:  
36  
37 10.35680/23720237.1334  
38  
39

40 36. Bovaird T. Beyond engagement and participation: user and community coproduction of  
41  
42 public services. *Public Adm Rev* 2007;67:846-60. doi:130.113.109.182  
43  
44

45 37. Loeffler E, Bovaird T. User and community co-production of public services: what does  
46  
47 the evidence tell us? *Int J Public Admin* 2016;39:1006-19. doi:10.1080/01900692.2016.1250559  
48

49 38. Palmer VJ, Weavell W, Callander R, et al. The participatory zeitgeist: an explanatory  
50  
51 theoretical model of change in an era of coproduction and codesign in healthcare improvement.  
52  
53 *Med Humanit* 2018;45:247-57. doi:10.1136/medhum-2017-011398  
54  
55  
56  
57  
58  
59  
60

- 1  
2  
3 39. Mulvale G, Green, J, Miatello, A et al. Finding harmony within dissonance: engaging  
4 patients, family/caregivers and service providers in research to fundamentally restructure  
5 relationships through integrative dynamics. *Health Expect* Forthcoming.  
6  
7  
8  
9  
10 40. Shapiro D. Negotiating the Nonnegotiable: How to Resolve Your Most Emotionally Charged  
11 Conflicts. New York, NY: Penguin 2016.  
12  
13  
14 41. Piper D, Iedema R, Gray J, et al. Utilizing experience-based co-design to improve the  
15 experience of patients accessing emergency departments in New South Wales public hospitals:  
16 an evaluation study. *Health Serv Manage Res* 2012;25:162-72. doi: 10.1177/0951484812474247  
17  
18  
19 42. Bradwell P, Marr, S. Making the most of collaboration: An international survey of public  
20 service co-design. London, UK: Demos 2008.  
21  
22  
23 43. Iedema R, Merrick E, Piper D, et al. Codesigning as a discursive practice in emergency  
24 health services: the architecture of deliberation. *J Appl Behav Sci* 2010;46:73-91.  
25  
26  
27  
28  
29  
30  
31 <https://doi.org/10.1177/0021886309357544>  
32  
33 44. Hickey G, Brearley S, Coldham T, et al. Guidance on co-producing a research project.  
34 Southampton: INVOLVE 2018.  
35  
36  
37 45. Staniszewska S, Brett J, Simera I, et al. GRIPP2 reporting checklists: tools to improve  
38 reporting of patient and public involvement in research. *BMJ* 2017;358:1-6.  
39  
40  
41  
42 <https://doi.org/10.1136/bmj.j3453>  
43  
44 46. Pawson R, Tilley N. Realistic Evaluation. London: Sage 1997.  
45  
46  
47 47. Rolfe S. Combining theories of change and realist evaluation in practice: lessons from a  
48 research on evaluation study. *Evaluation* 2019;25:294-316.  
49  
50  
51 <https://doi.org/10.1177/1356389019835229>  
52  
53  
54  
55  
56  
57  
58  
59  
60

1  
2  
3  
4  
5  
6  
7  
8  
9  
10  
11  
12  
13  
14  
15  
16  
17  
18  
19  
20  
21  
22  
23  
24  
25  
26  
27  
28  
29  
30  
31  
32  
33  
34  
35  
36  
37  
38  
39  
40  
41  
42  
43  
44  
45  
46  
47  
48  
49  
50  
51  
52  
53  
54  
55  
56  
57  
58  
59  
60

For peer review only

# BMJ Open

## Are you really doing “co-design”? Critical reflections when working with vulnerable populations

|                                 |                                                                                                                                                                                                                                                                                                                                                                                                                                                                                                                                                                                                        |
|---------------------------------|--------------------------------------------------------------------------------------------------------------------------------------------------------------------------------------------------------------------------------------------------------------------------------------------------------------------------------------------------------------------------------------------------------------------------------------------------------------------------------------------------------------------------------------------------------------------------------------------------------|
| Journal:                        | <i>BMJ Open</i>                                                                                                                                                                                                                                                                                                                                                                                                                                                                                                                                                                                        |
| Manuscript ID                   | bmjopen-2020-038339.R2                                                                                                                                                                                                                                                                                                                                                                                                                                                                                                                                                                                 |
| Article Type:                   | Communication                                                                                                                                                                                                                                                                                                                                                                                                                                                                                                                                                                                          |
| Date Submitted by the Author:   | 04-Oct-2020                                                                                                                                                                                                                                                                                                                                                                                                                                                                                                                                                                                            |
| Complete List of Authors:       | Moll, Sandra; McMaster University, School of Rehabilitation Science Wyndham-West, Michelle; OCAD University Mulvale, Gillian ; McMaster University, Park, Sean; McMaster University Faculty of Health Sciences Buettgean, Alexis; McMaster University, School of Rehabilitation Science Phoenix, Michelle; McMaster University Faculty of Health Sciences, School of Rehabilitation Science and CanChild Fleisig, Robert; McMaster University Faculty of Engineering, Walter G. Booth School of Engineering Practice and Technology Bruce, Emma; McMaster University, School of Rehabilitation Science |
| <b>Primary Subject Heading</b>: | Research methods                                                                                                                                                                                                                                                                                                                                                                                                                                                                                                                                                                                       |
| Secondary Subject Heading:      | Health services research                                                                                                                                                                                                                                                                                                                                                                                                                                                                                                                                                                               |
| Keywords:                       | STATISTICS & RESEARCH METHODS, QUALITATIVE RESEARCH, Organisation of health services < HEALTH SERVICES ADMINISTRATION & MANAGEMENT, Quality in health care < HEALTH SERVICES ADMINISTRATION & MANAGEMENT                                                                                                                                                                                                                                                                                                                                                                                               |
|                                 |                                                                                                                                                                                                                                                                                                                                                                                                                                                                                                                                                                                                        |

SCHOLARONE™  
Manuscripts





I, the Submitting Author has the right to grant and does grant on behalf of all authors of the Work (as defined in the below author licence), an exclusive licence and/or a non-exclusive licence for contributions from authors who are: i) UK Crown employees; ii) where BMJ has agreed a CC-BY licence shall apply, and/or iii) in accordance with the terms applicable for US Federal Government officers or employees acting as part of their official duties; on a worldwide, perpetual, irrevocable, royalty-free basis to BMJ Publishing Group Ltd ("BMJ") its licensees and where the relevant Journal is co-owned by BMJ to the co-owners of the Journal, to publish the Work in BMJ Open and any other BMJ products and to exploit all rights, as set out in our [licence](#).

The Submitting Author accepts and understands that any supply made under these terms is made by BMJ to the Submitting Author unless you are acting as an employee on behalf of your employer or a postgraduate student of an affiliated institution which is paying any applicable article publishing charge ("APC") for Open Access articles. Where the Submitting Author wishes to make the Work available on an Open Access basis (and intends to pay the relevant APC), the terms of reuse of such Open Access shall be governed by a Creative Commons licence – details of these licences and which [Creative Commons](#) licence will apply to this Work are set out in our licence referred to above.

Other than as permitted in any relevant BMJ Author's Self Archiving Policies, I confirm this Work has not been accepted for publication elsewhere, is not being considered for publication elsewhere and does not duplicate material already published. I confirm all authors consent to publication of this Work and authorise the granting of this licence.

1  
2  
3 **Are you really doing “co-design”? Critical reflections when working with**  
4  
5  
6 **vulnerable populations**  
7  
8

9 **Authors:** Sandra Moll<sup>1</sup>, Michelle Wyndham-West<sup>2</sup>, Gillian Mulvale<sup>1</sup>, Sean Park<sup>1</sup>, Alexis  
10 Buettgean<sup>1</sup>, Michelle Phoenix<sup>1</sup>, Robert Fleisig<sup>1</sup> & Emma Bruce<sup>1</sup>  
11  
12

13  
14 **Author affiliations:**

15 <sup>1</sup>McMaster University, Hamilton Ontario, Canada

16 <sup>2</sup>OCAD University, Toronto Ontario, Canada  
17  
18

19 **Corresponding author:**

20 Sandra Moll

21 School of Rehabilitation Science

22 Institute of Applied Health Sciences

23 McMaster University

24 1400 Main St. W.

25 Hamilton, ON L8S 1C7

26 phone: (905) 525-9140 x 23523

27 fax: 905-524-0069

28 email: molls@mcmaster.ca  
29  
30  
31  
32  
33

34 **Keywords:**

35 Patient participation

36 Ethics, research

37 Research design, qualitative

38 Quality improvement

39 Co-production  
40  
41

42 **Word count:** 2305 words  
43  
44  
45  
46  
47  
48  
49  
50  
51  
52  
53  
54  
55  
56  
57  
58  
59  
60

## Are you really doing “co-design”? Critical reflections when working with vulnerable populations

### Abstract

“Co-design” and associated terms such as “co-production” or “patient engagement”, are increasingly common in the health research literature, due to an increased emphasis on the importance of ensuring that research related to service/systems development is meaningful to end-users. However, there continues to be a lack of clarity regarding the key principles and practices of co-design, and wide variation in the extent to which service users are meaningfully engaged in the process. These issues are particularly acute when end-users include populations who have significant health and healthcare disparities that are linked to a range of intersecting vulnerabilities (e.g., poverty, language barriers, age, disability, minority status, stigmatized conditions). The purpose of this paper is to prompt critical reflection on the nature of co-design research with vulnerable populations, including key issues to consider in the initial planning phases, the implementation process, and final outputs. Risks and tensions will be identified in each phase of the process, followed by a tool to foster reflexivity in co-design processes to address these issues.

## Introduction

Over the last decade, co-design has emerged as a ubiquitous research and service/systems development approach across a myriad of health-oriented-disciplines including, but not limited to, health services,<sup>1-4</sup> quality improvement,<sup>5</sup> health technology development;<sup>6,7</sup> Indigenous health<sup>8,9</sup> and community-based health.<sup>10</sup> Application of co-design approaches are increasingly evident with populations who experience vulnerability due to social, economic and environmental barriers, from children,<sup>6,11,12</sup> through to older adults.<sup>13-15</sup> Researchers and practitioners within these disciplines have deployed co-design approaches across a range of settings, using various terms such as co-creation, co-production, co-research, experience-based co-design, human-centered design, technology co-design, participatory research, collaborative and community-based research.<sup>16,17</sup> The terms are linked to sets of core principles regarding the value of lived experience, collaboration, building on capabilities, and creativity.<sup>16</sup> Co-design, at a basic level, refers to application of user-centric research and service/systems development approaches in order to solve a particular problem or challenge.<sup>18</sup> However, co-design has also been described as a dynamic, creative approach to research that embraces partnership with community, and focuses on systems change and improving human experience.<sup>16</sup>

The increasing use of the term co-design and its associated methodologies has made it challenging to distinguish whether or not the term has been co-opted in such a way that sidesteps meaningful engagement with the original principles of co-design: distribution of power in research, amelioration of the human experience and positive societal impact. These issues are particularly acute when engaging populations who are 'vulnerable'; considering

1  
2  
3 vulnerability not as an individual characteristic, but as the result of social and systemic barriers  
4  
5 (e.g., poverty, literacy, language barriers, and discrimination related to age, disability status,  
6  
7 ethnicity/race, gender).  
8  
9

10 In this article, we critically discuss three questions, with a particular focus on research  
11  
12 with vulnerable service users: 1) What is the epistemological starting point that is underpinning  
13  
14 the decision to apply co-design processes and techniques? 2) How are co-design  
15  
16 methodologies, planned, applied, and adapted while engaging in iterative “research through  
17  
18 design” processes? 3) What type of post co-design outputs can be anticipated and created, and  
19  
20 what will the manifest and latent impacts of these outputs be? These questions are based on  
21  
22 synthesis of theoretical and practical writings about co-design from a range of disciplines,  
23  
24 including engineering, business, health sciences, rehabilitation, and social sciences, as well as  
25  
26 our own experiences as co-design researchers in these disciplines. Our standpoint as  
27  
28 researchers is informed by reflections on our varied experiences in co-design with a range of  
29  
30 communities, including families of children with disabilities, youth with mental health issues,  
31  
32 newcomers, and older adults who are precariously housed. The critical discussion which ensues  
33  
34 places a particular emphasis on how power is conceptualized, deployed and received<sup>19</sup> within  
35  
36 co-design processes aimed to ameliorate health services, products and experiences for  
37  
38 vulnerable individuals and groups.  
39  
40  
41  
42  
43  
44  
45  
46  
47  
48  
49

### 50 **Where are you starting from?**

51  
52 Advancing effective and ethical co-design should start with critical reflection on the  
53  
54 epistemological beliefs that are driving initiation of the process, including the ‘mindset’ of the  
55  
56  
57  
58  
59  
60

1  
2  
3 co-design facilitators. Co-design should begin with critical and embodied reflexivity that attends  
4  
5 to 1) ourselves – the subjective self or “I”; 2) our relationship with others – the intersubjective  
6  
7 “we”; and 3) the systems in which we and others are embedded – the objective “it”.<sup>20</sup>  
8  
9

10  
11  
12  
13 The first point of reflection is internal; as a facilitator of co-design, it is important to consider  
14  
15 the worldview, assumptions and values that you bring to the process. Co-design facilitators  
16  
17 need to embrace critical, reflexive practice, including development of a subjective, embodied  
18  
19 understanding of their own standpoints and epistemological frameworks that will impact their  
20  
21 relationships with others.<sup>21</sup> They need to be capable of improvising and taking other  
22  
23 perspectives, and be willing to be transformed in the process.<sup>22</sup> These capabilities are  
24  
25 cultivated through enhancing mindful awareness of, and working with the thoughts, emotions,  
26  
27 perceptions, sensations, that arise as part of being in an interpersonal relationship.<sup>23</sup>  
28  
29  
30  
31  
32  
33  
34

35 The second point of reflection is on your relationship with others who are engaged in the co-  
36  
37 design. This includes attending to the effects that you have as a researcher, educator and/or  
38  
39 practitioner at every step of the design process. It also involves a commitment to ongoing  
40  
41 dialogue about various ways of knowing, the interrogation of power and privilege, and making  
42  
43 the time and space to listen, share and co-create.<sup>24</sup> The humanity and multi-dimensionality of  
44  
45 all participants must be respected and attended to with care, compassion, creativity and  
46  
47 humility. Relationships require openness and vulnerability in the immediacy of human-to-  
48  
49 human connection.<sup>25</sup>  
50  
51  
52  
53  
54  
55  
56  
57  
58  
59  
60

1  
2  
3 The third and final point of reflection is on the system in which the co-design process will  
4  
5 occur. There may be a clash of values since many organizations operate within a socio-political  
6  
7 environment that privileges individualism over collectivism, self-sufficiency over collaboration,  
8  
9 and scientific expertise over other ways of knowing based on lived experiences.<sup>3,26</sup> The  
10  
11 fundamental principles of collaboration in co-design may be subverted in the drive for  
12  
13 efficiency and top-down decision making. Critical awareness and resistance to these pressures  
14  
15 may be needed in order to find the time and space required for an authentic way of working  
16  
17 together for social justice and change. Beginning a co-design project requires institutional  
18  
19 support to ensure that there is a commitment to critical thinking, learning and change,<sup>27</sup> that  
20  
21 diverse people are given an opportunity to participate,<sup>28</sup> and that sufficient resources (including  
22  
23 funding and space) are provided.  
24  
25  
26  
27  
28  
29  
30  
31

### 32 **What should you be doing?**

33  
34  
35  
36

37 Co-design has been described as both a philosophy and a method<sup>27</sup> that includes authentic and  
38  
39 equitable collaboration between stakeholders in projects that are emergent, flexible, and  
40  
41 iterative.<sup>28</sup> There are several specific approaches that have been used in the context of  
42  
43 healthcare, including experience-based co-design (EBCD),<sup>29,30</sup> participatory research,<sup>1,8</sup> and user  
44  
45 centred design.<sup>31</sup> Each approach has its own processes and tools, but there are several  
46  
47 overarching issues to consider in optimizing the process of collaboration and design.  
48  
49  
50  
51  
52  
53  
54  
55  
56  
57  
58  
59  
60

1  
2  
3 First, it is critical to include diverse people in the co-design process, including those with lived  
4 experience, those who deliver or implement a service or program, and other key stakeholders  
5 or influencers.<sup>28</sup> A noteworthy criticism of co-design specifically, and patient-oriented research  
6 generally, is that vulnerable populations may be excluded<sup>32</sup> or represented by 'super users' who  
7 do not reflect the typical population.<sup>33</sup> Super users are individuals who frequently contribute to  
8 research projects. They are often invited to participate since they are actively engaged,  
9 articulate, and clearly understand their role in the process. One of the dangers, however, is  
10 that over time, socialization to their research role may desensitize them to the perspective of  
11 those experiencing greater disenfranchisement.<sup>33</sup> It takes time and effort to ensure  
12 representation from the important, but often unheard voices of communities who face many  
13 barriers to engagement.  
14  
15  
16  
17  
18  
19  
20  
21  
22  
23  
24  
25  
26  
27  
28  
29  
30  
31

32 When engaging groups from historically marginalized communities, sensitivity to power  
33 differentials and creative approaches may be needed to ensure a safe and inclusive space for  
34 collaboration. Invited spaces have been criticized for perpetuating marginalization and  
35 tokenism, since unexamined power imbalances may delegitimize forms of knowledge that  
36 depart from the status quo.<sup>34</sup> Principles and tools for engagement could include: a) formalizing  
37 agreements for shared leadership, decision making and ownership of knowledge; b) providing  
38 training and ongoing mentorship for new participants who may be uncomfortable and/or  
39 unfamiliar with the process; c) ensuring flexibility to account for differences and fluctuations in  
40 ability to participate; and d) establishing formal recognition for the value of service user  
41 input.<sup>28,33,34</sup> Richards and colleagues<sup>35</sup> present an insightful argument regarding compensation  
42  
43  
44  
45  
46  
47  
48  
49  
50  
51  
52  
53  
54  
55  
56  
57  
58  
59  
60



1  
2  
3 for service users in order to recognize vulnerability, promote equity, facilitate commitment, and  
4  
5 remove barriers to participation. They suggest starting the conversation early to build  
6  
7 relationships, negotiating a fair rate that addresses the needs of all parties, and establishing a  
8  
9 formal agreement on roles and responsibilities in order to avoid the risk of tokenism.  
10  
11  
12  
13

14  
15 Specific steps of co-design may vary depending upon the project, however, core processes  
16  
17 include building trust, finding voice, sharing perspectives and creating a common vision for  
18  
19 change.<sup>28</sup> Arts-based tools and techniques can be incorporated to generate initial insights into  
20  
21 stakeholder experiences, as well to foster creativity in designing solutions. Generative design  
22  
23 strategies, as outlined by Sanders & Stappers,<sup>31</sup> emphasize the role of “doing” and “making” as  
24  
25 alternate paths of expression that can evoke deeper insights and creative solutions. They  
26  
27 highlight how a range of probes, generative toolkits and prototyping strategies can facilitate the  
28  
29 co-design process, using creative tools such as video, storyboards, clay and even Lego to evoke  
30  
31 insights and ideas that transcend what people might put into words. These strategies may be  
32  
33 particularly effective to engage service users who may have difficulty with purely verbal  
34  
35 interviews or focus group discussions (eg. recent immigrants, young children, older adults with  
36  
37 dementia).  
38  
39  
40  
41  
42  
43  
44  
45  
46

47 Rather than following a series of rigid steps, working with vulnerable populations requires  
48  
49 following a set of core principles; “taking time to fully engage, listen for understanding and not  
50  
51 move forward until participants or communities are ready”.<sup>28(p295)</sup> One of the challenges for co-  
52  
53  
54  
55  
56  
57  
58  
59  
60

1  
2  
3 design facilitators is responding to pressures related to resource and time constraints that could  
4  
5  
6 compromise the process.<sup>27</sup>  
7  
8  
9

### 10 **What are your intended outputs?**

11  
12  
13  
14

15 In addition to how co-design is implemented, it is critical to examine outputs of the process.

16  
17 With its roots in design thinking and action research, co-design involves creating prototype  
18  
19 solutions to address the priority problems or issues. Ultimately, the process should continue to  
20  
21 implementation and evaluation of the proposed solutions, with a commitment to ongoing  
22  
23 collaboration in the process of change.<sup>36,37</sup> Without this movement to positive change,  
24  
25 participants can become disempowered and even resentful, particularly with perpetuation of  
26  
27 the status quo.  
28  
29  
30  
31  
32  
33  
34

35 The specific outputs and outcomes of co-design are varied, but can occur on several levels,  
36  
37 from individual to systems change. A survey of 59 EBCD projects in 6 countries found that most  
38  
39 projects initially targeted small quality improvements, however the legacies of the co-design  
40  
41 work had much larger impacts in terms of “deep changes in attitudes and behaviors”.<sup>30</sup>  
42  
43 Similarly, Palmer et al.<sup>38</sup> argue that while practical solutions are important, the skills gained by  
44  
45 service users, family/caregivers and staff in negotiating new ways of advancing the future that  
46  
47 they have helped to shape is even more significant. This can be particularly important for  
48  
49 groups who have a history of fractured relations (eg. mental health service users), wherein new  
50  
51 shared identities can be developed as the basis for a restructuring of future relationships.<sup>39,40</sup>  
52  
53  
54  
55  
56  
57  
58  
59  
60

1  
2  
3 These attitudinal and behavioural shifts are important in shifting culture within a service, and  
4 thereby improve the inter-personal dynamics of care,<sup>41</sup> including power sharing and enhanced  
5 communication between service professionals and users.<sup>42</sup> The ultimate hope is for positive,  
6 sustained change in health and/or social services through outputs of greater empathy,  
7 increased trust, shared commitment and advocacy.<sup>38</sup> The extent to which this occurs will  
8 depend on adopting and adhering to core principles and skilled facilitation.<sup>28,43</sup>  
9  
10  
11  
12  
13  
14  
15  
16  
17  
18  
19  
20  
21  
22

### 23 **The way forward**

24  
25 The ubiquity of co-design as a strategy for health service and system reform, and the diversity  
26 in how it is defined, begs the question of whether there should be standards for  
27 implementation and evaluation, as well as critical reflection on the implications of doing this  
28 work with participants who experience a range of vulnerabilities.  
29  
30  
31  
32  
33  
34  
35  
36

37 As noted earlier, careful planning and critical reflection is needed to ensure that the process  
38 does not produce “token” service user involvement or further perpetuate inequities. A useful  
39 guidance document developed by INVOLVE<sup>44</sup> outlines key principles and strategies to consider  
40 in co-producing a research project. Also, guidelines for reporting on patient and public  
41 involvement in health and social care research (GRIPP2) have been proposed as a strategy to  
42 advance quality and transparency in co-design.<sup>45</sup> These guidelines are a helpful step toward  
43 consistency in language and reporting of co-design processes, outputs and outcomes, as well as  
44 a useful tool for generating critical reflection on the engagement of service users in research.  
45  
46  
47  
48  
49  
50  
51  
52  
53  
54  
55  
56  
57  
58  
59  
60

1  
2  
3 The next steps are to create more specific questions to critically evaluate co-design projects  
4  
5 stemming from the three overarching questions addressed in this article. Table 1 outlines a list  
6  
7 of suggested sub-questions to consider, which reflect the high level of engagement expected  
8  
9 throughout the entirety of a co-design project. It should be noted that these questions are  
10  
11 directed towards researchers and facilitators of co-design initiatives, as a tool to prompt  
12  
13 reflexive analysis. Stakeholders who represent community partners and end users should also  
14  
15 be engaged in dialogue about how to optimize the co-design process.  
16  
17  
18  
19  
20  
21  
22

23 [Insert Table 1 about here]  
24  
25  
26  
27

28 Another key step forward will be more robust evaluation of co-design work, in terms of costs  
29  
30 and benefits, quality improvement and wider systems impacts.<sup>30</sup> In their review of health-  
31  
32 related co-design research, Slatterly and colleagues<sup>18</sup> echo the call for systematic research on  
33  
34 the effectiveness of various co-design approaches and strategies. They emphasize that  
35  
36 research should be theoretically informed, and build on implementation science principles that  
37  
38 capture the context and complexity of the co-design process. Realist evaluation, therefore, is a  
39  
40 promising approach, since it considers the impact of the context, as well as the mechanisms of  
41  
42 change that shape project outcomes.<sup>46</sup> Realist evaluations are also based on a theory of change  
43  
44 which can help to explicate the relationship between various dimensions of the co-design  
45  
46 process and how they lead to change.<sup>47</sup>  
47  
48  
49  
50  
51  
52  
53  
54  
55  
56  
57  
58  
59  
60

1  
2  
3 In conclusion, it should be recognized that co-design can be a powerful tool to contest  
4  
5 vulnerability through authentic collaboration in research and service / system design. Co-design  
6  
7 is a philosophy and method that has the potential to empower people, both researchers and  
8  
9 participants, service providers and service users, policy makers and community members. It  
10  
11 must be recognized, however, that co-design is ultimately a relational process and as such,  
12  
13 careful attention must be paid to ensuring that the process does not perpetuate inequities. The  
14  
15 realities of fiscal and time constraints must be balanced with critical reflexivity and  
16  
17  
18  
19  
20  
21  
22  
23  
24  
25  
26  
27  
28  
29  
30  
31  
32  
33  
34  
35  
36  
37  
38  
39  
40  
41  
42  
43  
44  
45  
46  
47  
48  
49  
50  
51  
52  
53  
54  
55  
56  
57  
58  
59  
60

**Table 1 - A Tool to Foster Reflexivity in Co-Design with Vulnerable Populations**

|                                                                                                                                                                                                                                                                                                                                                                                                                                                                                                                                                                                                          |
|----------------------------------------------------------------------------------------------------------------------------------------------------------------------------------------------------------------------------------------------------------------------------------------------------------------------------------------------------------------------------------------------------------------------------------------------------------------------------------------------------------------------------------------------------------------------------------------------------------|
| <p><b><i>Where are you starting from?</i></b></p> <ol style="list-style-type: none"> <li>1. What are your worldviews, assumptions and values relevant to the issue(s) or problem(s) you are trying to address? How open are you to being transformed by other worldviews?</li> <li>2. How will you respectfully interact and compassionately attend to human diversity, and various ways of knowing?</li> <li>3. How will you interrogate power and privilege?</li> <li>4. How will you make time and space for sharing, dialogue and co-creation despite timelines and resource constraints?</li> </ol> |
| <p><b><i>What should you be doing?</i></b></p> <ol style="list-style-type: none"> <li>1. How will you purposefully select a broad range of stakeholder perspectives and representatives? How do you define inclusive participation?</li> <li>2. What tools, processes and techniques will you use to fully understand lived experiences, build rapport and foster trust within an environment of open and respectful dialogue?</li> <li>3. How will you tap into tacit knowledge, creativity and shared meaning of diverse perspectives to co-create a shared vision for improvement?</li> </ol>         |
| <p><b><i>What are your intended outputs?</i></b></p> <ol style="list-style-type: none"> <li>1. How will you facilitate implementation of prototype solutions?</li> <li>2. How will you foster commitment to change to minimize the risk of tokenistic engagement of vulnerable populations and perpetuating the status quo?</li> </ol>                                                                                                                                                                                                                                                                   |

- 1
  - 2
  - 3
  - 4
  - 5
  - 6
  - 7
  - 8
  - 9
  - 10
  - 11
  - 12
  - 13
  - 14
  - 15
  - 16
  - 17
  - 18
  - 19
  - 20
  - 21
  - 22
  - 23
  - 24
  - 25
  - 26
  - 27
  - 28
  - 29
  - 30
  - 31
  - 32
  - 33
  - 34
  - 35
  - 36
  - 37
  - 38
  - 39
  - 40
  - 41
  - 42
  - 43
  - 44
  - 45
  - 46
  - 47
  - 48
  - 49
  - 50
  - 51
  - 52
  - 53
  - 54
  - 55
  - 56
  - 57
  - 58
  - 59
  - 60
3. How will your co-design processes build capacity and forge new ways of communicating, and in doing so shift service cultures toward greater empathy, trust, shared commitment and advocacy?
4. How will you determine if your project has achieved the desired outcomes? Will these outcomes be sustainable?

For peer review only

1  
2  
3  
4  
5  
6 **Contributorship statement:** The first author (SM) was responsible for the overall paper,  
7 incorporating input from the team. MWW, GM, SP, AB, MP were all involved in writing sections  
8 of the paper. All authors (including RF & EB) were involved in the conceptualization of the paper  
9 and provided feedback on draft versions.  
10

11 **Competing interests:** No competing interests for any author.  
12  
13

14 **Funding:** The Co-design hub for Vulnerable Populations is funded through the McMaster  
15 (SAF2019) Strategic Alignment Initiative.  
16

17  
18 **Data sharing:**  
19

20 I, the Submitting Author has the right to grant and does grant on behalf of all authors of the  
21 Work (as defined in the below author licence), an exclusive licence and/or a non-exclusive  
22 licence for contributions from authors who are: i) UK Crown employees; ii) where BMJ has  
23 agreed a CC-BY licence shall apply, and/or iii) in accordance with the terms applicable for US  
24 Federal Government officers or employees acting as part of their official duties; on a  
25 worldwide, perpetual, irrevocable, royalty-free basis to BMJ Publishing Group Ltd (“BMJ”) its  
26 licensees and where the relevant Journal is co-owned by BMJ to the co-owners of the Journal,  
27 to publish the Work in BMJ Open and any other BMJ products and to exploit all rights, as set  
28 out in our [licence](#).  
29  
30  
31

32 The Submitting Author accepts and understands that any supply made under these terms is  
33 made by BMJ to the Submitting Author unless you are acting as an employee on behalf of your  
34 employer or a postgraduate student of an affiliated institution which is paying any applicable  
35 article publishing charge (“APC”) for Open Access articles. Where the Submitting Author wishes  
36 to make the Work available on an Open Access basis (and intends to pay the relevant APC), the  
37 terms of reuse of such Open Access shall be governed by a Creative Commons licence – details  
38 of these licences and which [Creative Commons](#) licence will apply to this Work are set out in our  
39 licence referred to above.  
40  
41  
42  
43  
44  
45  
46  
47  
48  
49  
50  
51  
52  
53  
54  
55  
56  
57  
58  
59  
60



## References

1. Bowen S, McSeveny K, Lockley E, et al. How was it for you? Experiences of participatory design in the UK health service. *CoDesign* 2013;9:230-46.
2. Bowen S, Dearden A, Wright P, et al. Co-designing better outpatient services for older people: inspiration stories for participatory design with health and social care institutions workshop. 11th Biennial Participatory Design; 2010 Nov; Sydney, Australia.
3. Mulvale G, Moll S, Miatello A, et al. Codesigning health and other public services with vulnerable and disadvantaged populations: insights from an international collaboration. *Health Expect* 2019;22:284-97.
4. Wolstenholme D, Cobb MR, Bowen S, et al. Design led service improvement for older people. *Australas Med J* 2010;3:465-70.
5. Greenhalgh T, Russell J, Swinglehurst D. Narrative methods in quality improvement research. *Qual Saf Health Care* 2005;14:443-49.
6. Allsop MJ, Holt RJ, Levesley MC, et al. The engagement of children with disabilities in health-related technology design processes: identifying methodology. *Disabil Rehabil Assist Technol* 2010;5:1-13.
7. Sutcliffe A, Thew S, Bruijn O, et al. User engagement by user-centred design in e-health. *Phil Trans R Soc A* 2010;368:4209-24.
8. Blodgett AT, Schinke RJ, Peltier D, et al. May the circle be unbroken: the research recommendations of aboriginal community members engaged in participatory action research with university academics. *J Sport Soc Issues* 2011;35:264-83.
9. Moscou K, Rempel K, Beeman C, et al. A healthy neighbourhood: voices of indigenous youth. Brandon, Manitoba, Canada: Centre for Aboriginal and Rural Education Studies 2018.

10. Buffel T, Handler S, Philipson C, editors. Age-Friendly Cities and Communities: A Global Perspective. Great Britain: Policy Press 2018.
11. Beresford B. Working on well-being: researchers' experiences of a participative approach to understanding the subjective well-being of disabled young people. *Child Soc* 2012;26:234-41.
12. Veinot TC, Flicker SE, Skinner HA, et al. 'Supposed to make you better but it doesn't really': HIV-positive youths' perceptions of HIV treatment. *J Adolesc Health* 2006;38:261-67.
13. Holroyd-Leduc J, Resin J, Ashley L, et al. Giving voice to older adults living with frailty and their family caregivers: engagement of older adults living with frailty in research, health care decision making, and in health policy. *Res Involv Engagem* 2016;2:1-19.
14. Burnell K, Selwood A, Sullivan T, et al. Involving service users in the development of the support at home: interventions to enhance life in dementia carer supporter programme for family carers of people with dementia. *Health Expect* 2015;18:95-110.
15. Tanner D. Co-research with older people with dementia: experience and reflections. *J Ment Health* 2012;21:296-306.
16. Greenhalgh T, Jackson C, Shaw S, et al. Achieving research impact through co-creation in community-based health services: literature review and case study. *Milbank Q* 2016;94:392-429.
17. Littlechild R, Tanner D, Hall K. Co-research with older people: Perspectives on impact. *Qual Soc Work* 2015;14:18-35.
18. Slattery P, Saeri A, Bragge P. Research co-design in health: a rapid overview of reviews. *Health Res Policy Syst* 2020;18:1-13.
19. Allen A. The Politics of Ourselves: Power, Autonomy and Gender in Contemporary Critical Theory. New York: Columbia University Press 2013.
20. Hochachka G. Developing Sustainability, Developing the Self: An Integral Approach to

- 1  
2  
3 International and Community Development. Victoria, Canada: Trafford 2009.
- 4  
5 21. Cunliffe AL. On becoming a critically reflexive practitioner. *Journal of Management*  
6  
7  
8 *Education* 2004;28:407-26. <http://dx.doi.org/10.1177/1052562904264440>  
9
- 10 22. Keeney H, Keeney B, Chenail R. Recursive Frame Analysis: A Qualitative Research Method  
11  
12 for Mapping Change-Oriented Discourse. Fort Lauderdale, FL: TQR Books 2015.
- 13  
14 23. Varela F. Ethical know-how: Action, wisdom, cognition. Palo Alto, CA: Stanford University  
15  
16 Press 1999.
- 17  
18 24. Hankivsky O. Intersectionality 101. Burnaby: Institute for Intersectionality Research and  
19  
20 Policy, Simon Fraser University 2014.
- 21  
22 25. Cipolla C. Designing for vulnerability: interpersonal relations and design. *She Ji: The*  
23  
24 *Journal of Design, Economics, and Innovation* 2018;4:111-22.  
25  
26 <http://dx.doi.org/10.1016/j.sheji.2018.03.001>  
27  
28
- 29 26. Kelly K, Caputo T. Community: A Contemporary Analysis of Policies, Programs, and  
30  
31 Practices. Toronto, Ontario: University of Toronto Press 2011.
- 32  
33 27. Donetto S, Pierri P, Tsianakas V, et al. Experience based co-design and healthcare  
34  
35 improvement: realizing participatory design in the public sector. *The Design Journal*  
36  
37 2015;18:227-48. doi:10.2752/175630615x14212498964312  
38  
39
- 40 28. Mulvale G, Moll S, Miatello A, et al. Co-designing services for youth with mental health  
41  
42 issues: novel elicitation approaches. *Int J Qual Methods* 2019;18. doi:  
43  
44 10.1177/1609406918816244  
45  
46
- 47 29. Bate P, Robert G. Bringing User Experience to Healthcare Improvement: The Concepts,  
48  
49 Methods and Practices of Experience-Based Design. Oxford: Radcliffe Publishing 2007.
- 50  
51  
52  
53 30. Donetto S, Tsianakas, V, Robert, G. Using Experience-based Co-design (EBCD) to improve  
54  
55  
56  
57  
58  
59  
60

1  
2  
3 the quality of healthcare: mapping where we are now and establishing future directions. London:  
4 King's College London, 2014.  
5

6  
7  
8 31. Sanders E, Stappers P. Probes, toolkits and prototypes: three approaches to making in  
9  
10 codesigning. *CoDesign* 2014;10:5-14. <http://dx.doi.org/10.1080/15710882.2014.888183>

11  
12 32. Gonzalez M, Phoenix M, Saxena S, et al. Strategies used to engage hard-to-reach populations  
13  
14 in childhood disability research: a scoping review. *Disabil Rehabil* Published Online First: Jan  
15  
16 30 2020. doi: 10.1080/09638288.2020.1717649 doi:10.1080/09638288.2020.1717649

17  
18  
19 33. Black A, Strain K, Wallsworth C, et al. What constitutes meaningful engagement for patients  
20  
21 and families as partners on research teams? *J Health Serv Res Policy* 2018;23:158-67.  
22  
23 doi:10.1177/1355819618762960

24  
25  
26 34. De Freitas C, Martin G. Inclusive public participation in health: policy, practice and  
27  
28 theoretical contributions to promote the involvement of marginalised groups in healthcare. *Soc*  
29  
30 *Sci Med* 2015;135:31-39. doi: 10.1016/j.socscimed.2015.04.019

31  
32  
33 35. Richards DP, Jordan I, Strain K, et al. Patient partner compensation in research and health  
34  
35 care: the patient perspective on why and how. *Patient Exp J* 2018;5:6-12. doi:  
36  
37 10.35680/23720237.1334

38  
39  
40 36. Bovaird T. Beyond engagement and participation: user and community coproduction of  
41  
42 public services. *Public Adm Rev* 2007;67:846-60. doi:130.113.109.182

43  
44  
45 37. Loeffler E, Bovaird T. User and community co-production of public services: what does  
46  
47 the evidence tell us? *Int J Public Admin* 2016;39:1006-19. doi:10.1080/01900692.2016.1250559

48  
49  
50 38. Palmer VJ, Weavell W, Callander R, et al. The participatory zeitgeist: an explanatory  
51  
52 theoretical model of change in an era of coproduction and codesign in healthcare improvement.  
53  
54 *Med Humanit* 2018;45:247-57. doi:10.1136/medhum-2017-011398

- 1  
2  
3 39. Mulvale G, Green, J, Miatello, A et al. Finding harmony within dissonance: engaging  
4 patients, family/caregivers and service providers in research to fundamentally restructure  
5 relationships through integrative dynamics. *Health Expect* Forthcoming.  
6  
7  
8  
9  
10 40. Shapiro D. Negotiating the Nonnegotiable: How to Resolve Your Most Emotionally Charged  
11 Conflicts. New York, NY: Penguin 2016.  
12  
13  
14 41. Piper D, Iedema R, Gray J, et al. Utilizing experience-based co-design to improve the  
15 experience of patients accessing emergency departments in New South Wales public hospitals:  
16 an evaluation study. *Health Serv Manage Res* 2012;25:162-72. doi: 10.1177/0951484812474247  
17  
18  
19 42. Bradwell P, Marr, S. Making the most of collaboration: An international survey of public  
20 service co-design. London, UK: Demos 2008.  
21  
22  
23 43. Iedema R, Merrick E, Piper D, et al. Codesigning as a discursive practice in emergency  
24 health services: the architecture of deliberation. *J Appl Behav Sci* 2010;46:73-91.  
25  
26  
27  
28  
29  
30  
31 <https://doi.org/10.1177/0021886309357544>  
32  
33 44. Hickey G, Brearley S, Coldham T, et al. Guidance on co-producing a research project.  
34 Southampton: INVOLVE 2018.  
35  
36  
37 45. Staniszewska S, Brett J, Simera I, et al. GRIPP2 reporting checklists: tools to improve  
38 reporting of patient and public involvement in research. *BMJ* 2017;358:1-6.  
39  
40  
41  
42 <https://doi.org/10.1136/bmj.j3453>  
43  
44 46. Pawson R, Tilley N. Realistic Evaluation. London: Sage 1997.  
45  
46  
47 47. Rolfe S. Combining theories of change and realist evaluation in practice: lessons from a  
48 research on evaluation study. *Evaluation* 2019;25:294-316.  
49  
50  
51 <https://doi.org/10.1177/1356389019835229>  
52  
53  
54  
55  
56  
57  
58  
59  
60

1  
2  
3  
4  
5  
6  
7  
8  
9  
10  
11  
12  
13  
14  
15  
16  
17  
18  
19  
20  
21  
22  
23  
24  
25  
26  
27  
28  
29  
30  
31  
32  
33  
34  
35  
36  
37  
38  
39  
40  
41  
42  
43  
44  
45  
46  
47  
48  
49  
50  
51  
52  
53  
54  
55  
56  
57  
58  
59  
60

For peer review only
